# Supplementary material for: Vascular Plant One-Zinc-Finger (VOZ) Transcription Factors Are Positive Regulators of Salt Tolerance in Arabidopsis
Source: MDPI journal article supplement (doi:10.3390/ijms19123731), 2018-11-23
Supplement: s1 [file s1]

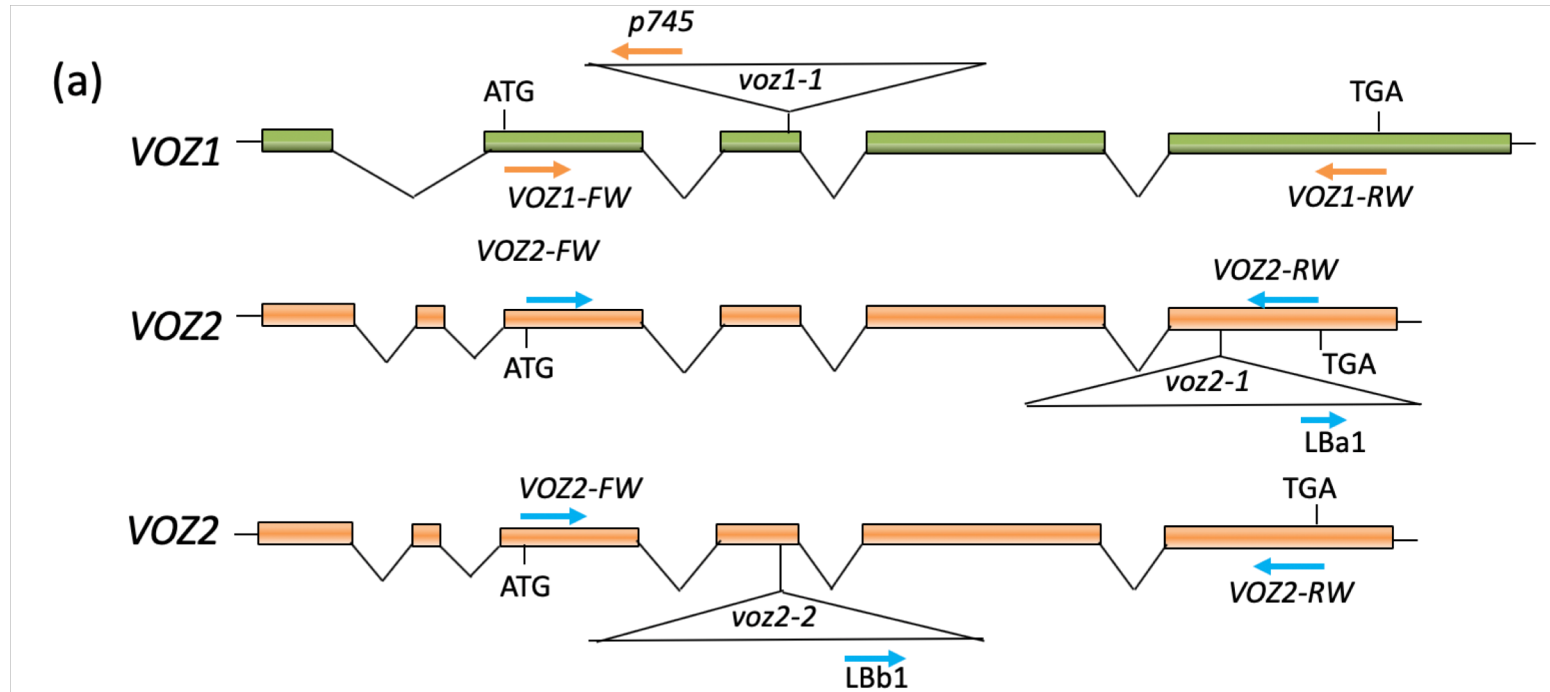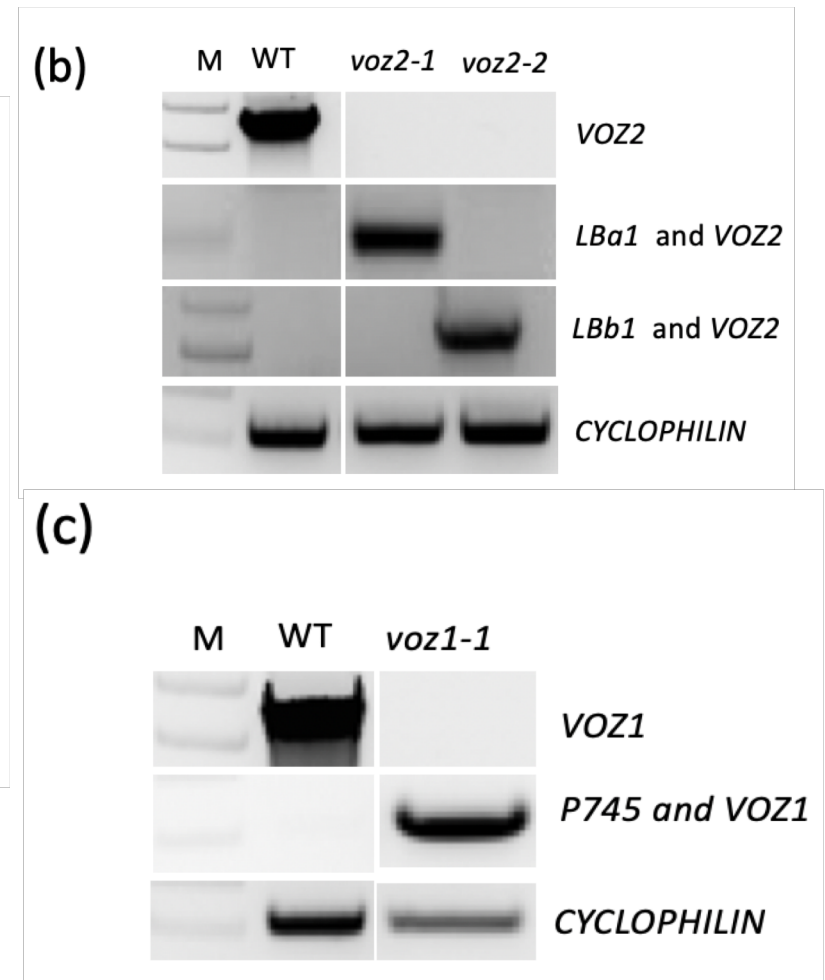

**Figure S1.** Genotyping of *VOZ1* and *VOZ2* single mutants. Prior to phenotypic analysis, genotypes were confirmed by genomic PCR. **(a)** Graphical illustrations of Arabidopsis *VOZ1* and *VOZ2* mutants. The exons are represented as boxes and introns are marked as black lines. The T-DNA insertion sites are marked by triangles. The location of each primers that were used for the genotyping are indicated by colored arrows. **(b)** Top panel (PCR with *VOZ2*-specific primers); second panel (PCR with T-DNA-specific LbA1 and *VOZ2*-specific reverse primers); third panel (PCR with T-DNA-specific LbB1 and *VOZ2*-specific reverse primers) and bottom panel (PCR with *CYCLOPHILIN*-specific primers). In all cases expected amplicon size was obtained. **(c)** Top panel (PCR with *VOZ1*-specific primers); middle panel (PCR with *Tn* insertion specific primer *P745* and *VOZ1*-specific forward primer); bottom panel (PCR with *CYCLOPHILIN*-specific primers). In all cases expected amplicon size was obtained.

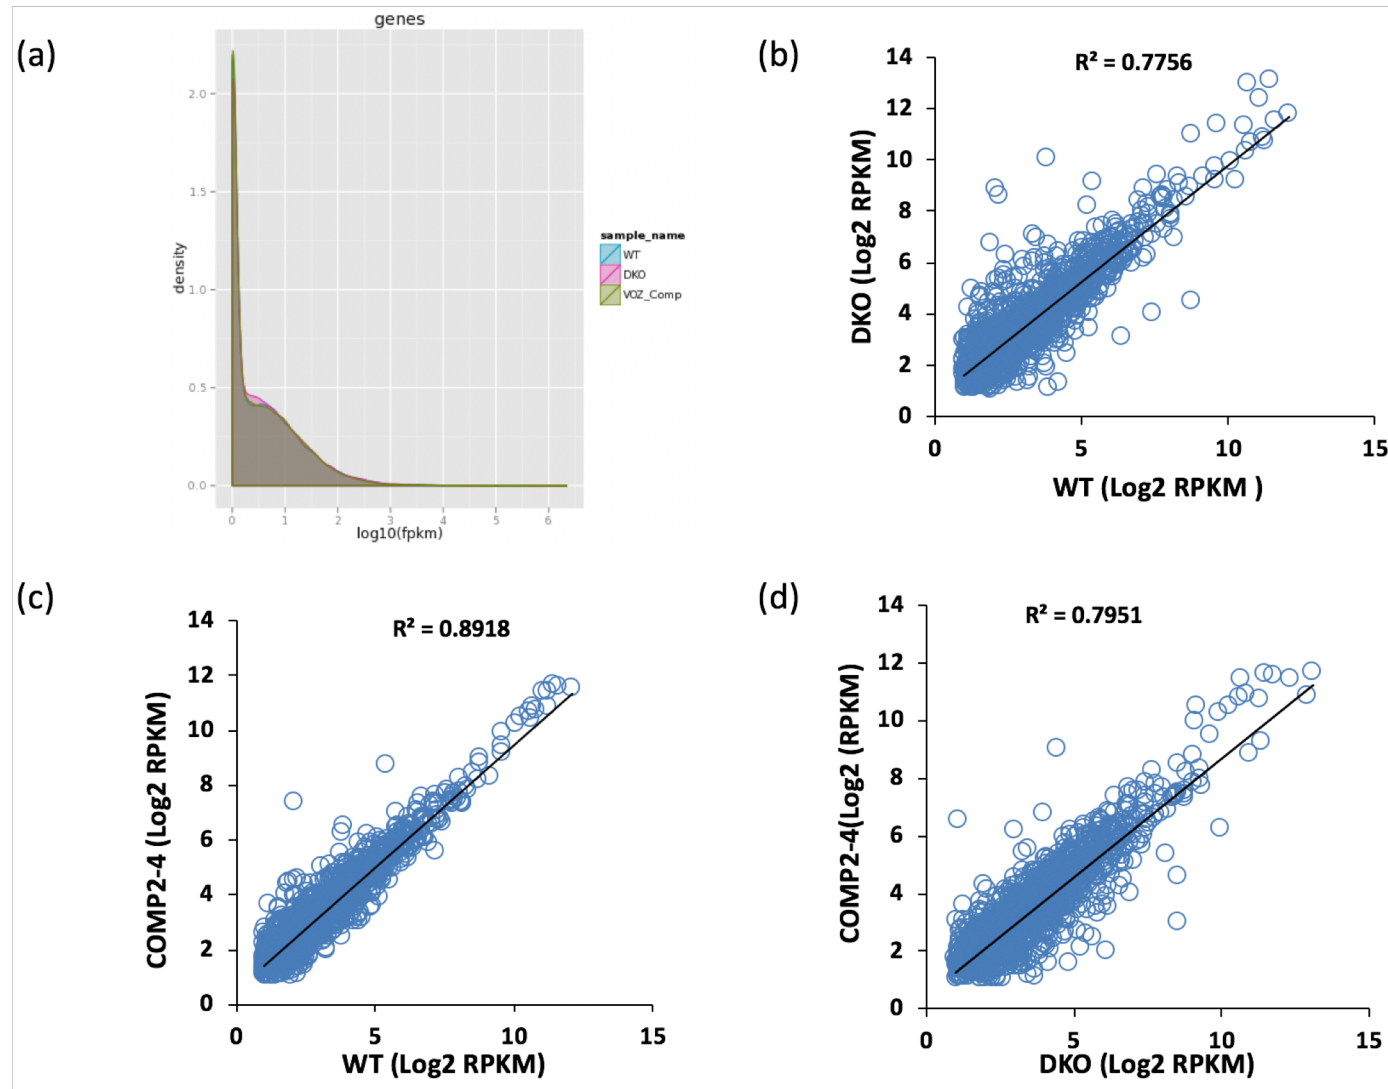

**Figure S2.** Scatter plots of expression values between genotypes. **(a)** Expression level distribution for all genes in WT, *DKO* and COMP2-4. **(b)** to **(d)** The average Log2 transformed values between the genotypes are plotted. In addition, the  $R^2$  value is presented in each panel.

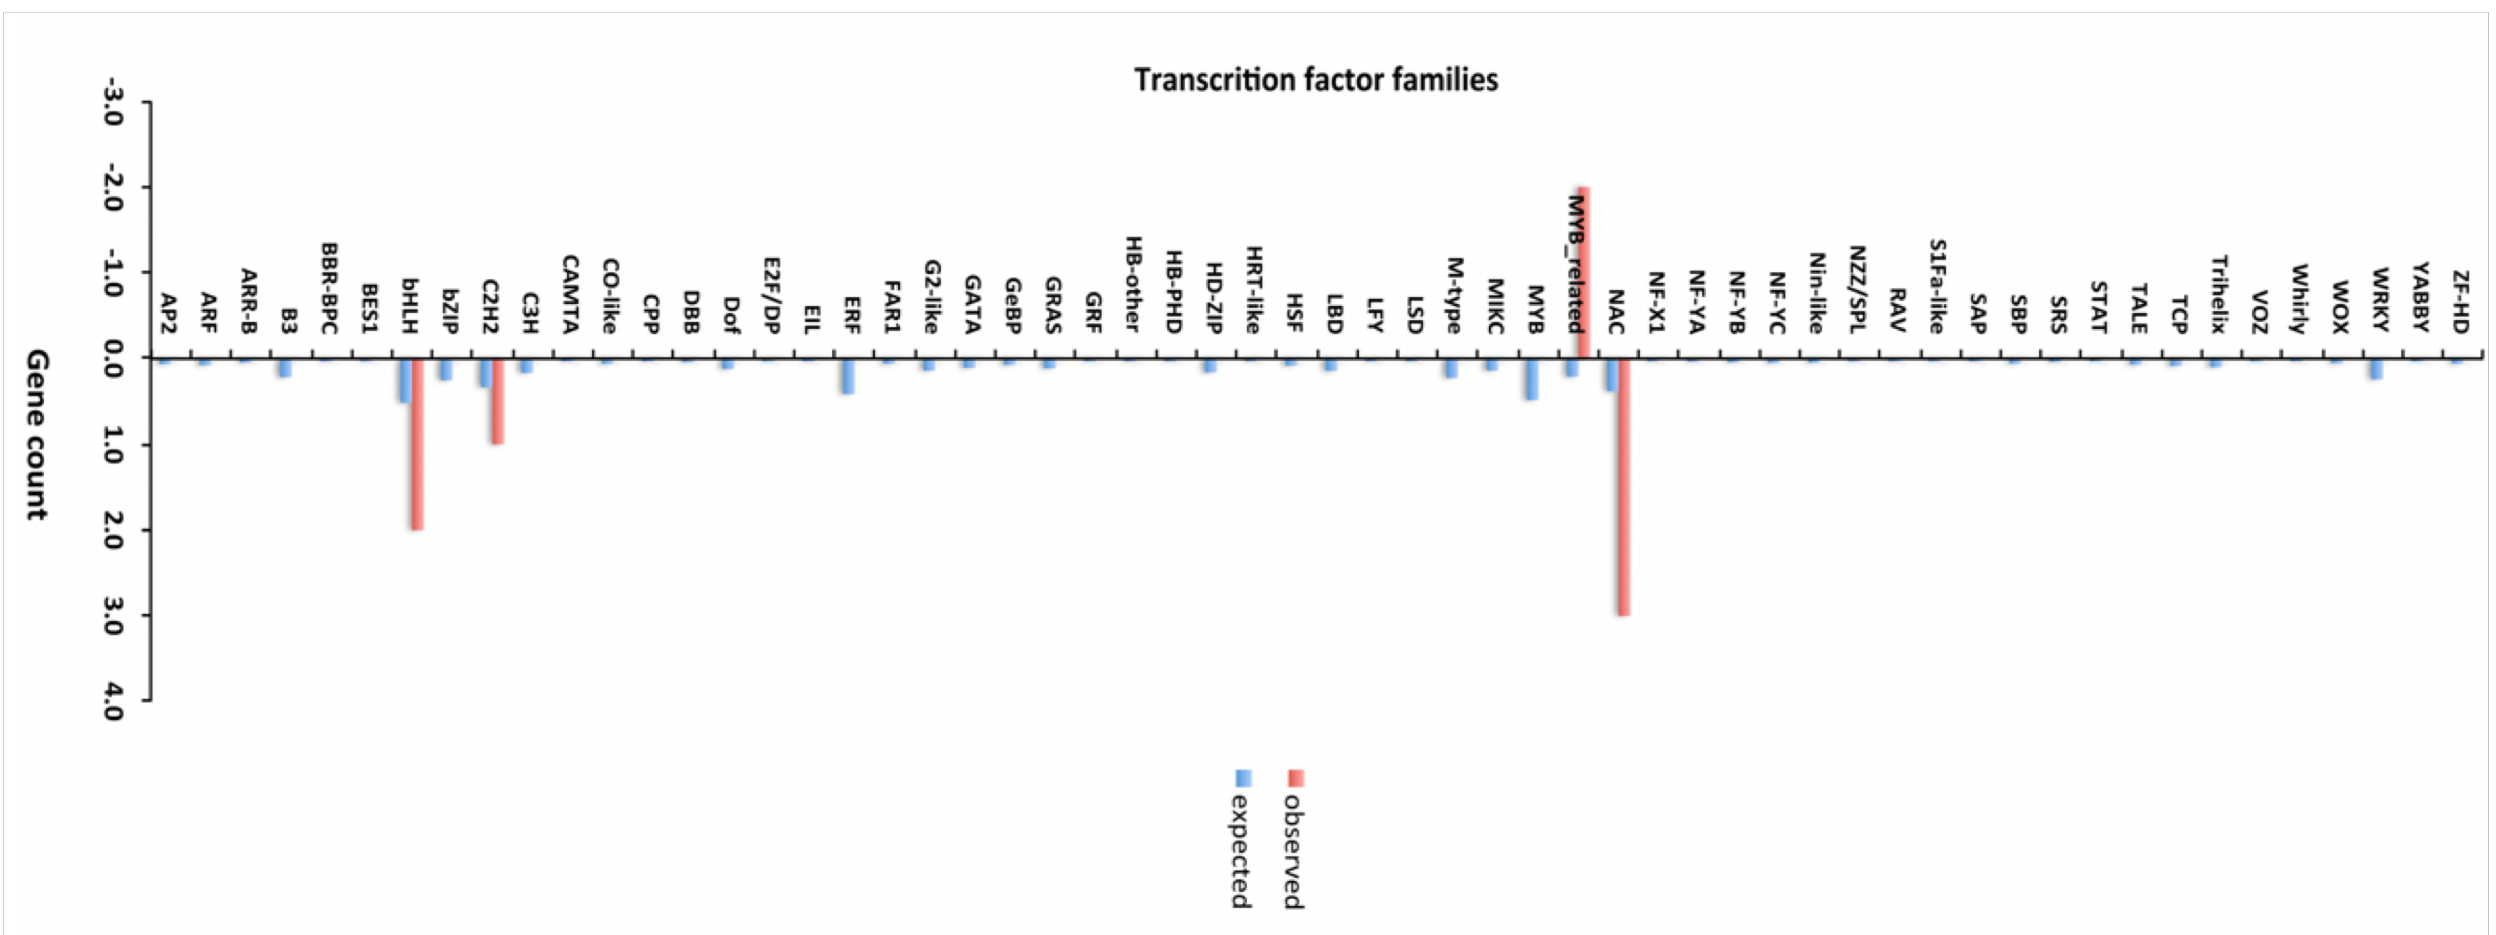

**Figure S3.** TF gene families in DE genes A) Enrichment of TF families in all DE genes. DE genes are enriched ( $P \leq 0.05$ ) for specific TF families. Observed: Number of genes associated with particular TF family in DE genes. Expected: Number of genes expected in each individual TF family in the genome. Up- and down-regulated genes in each TF family are shown.

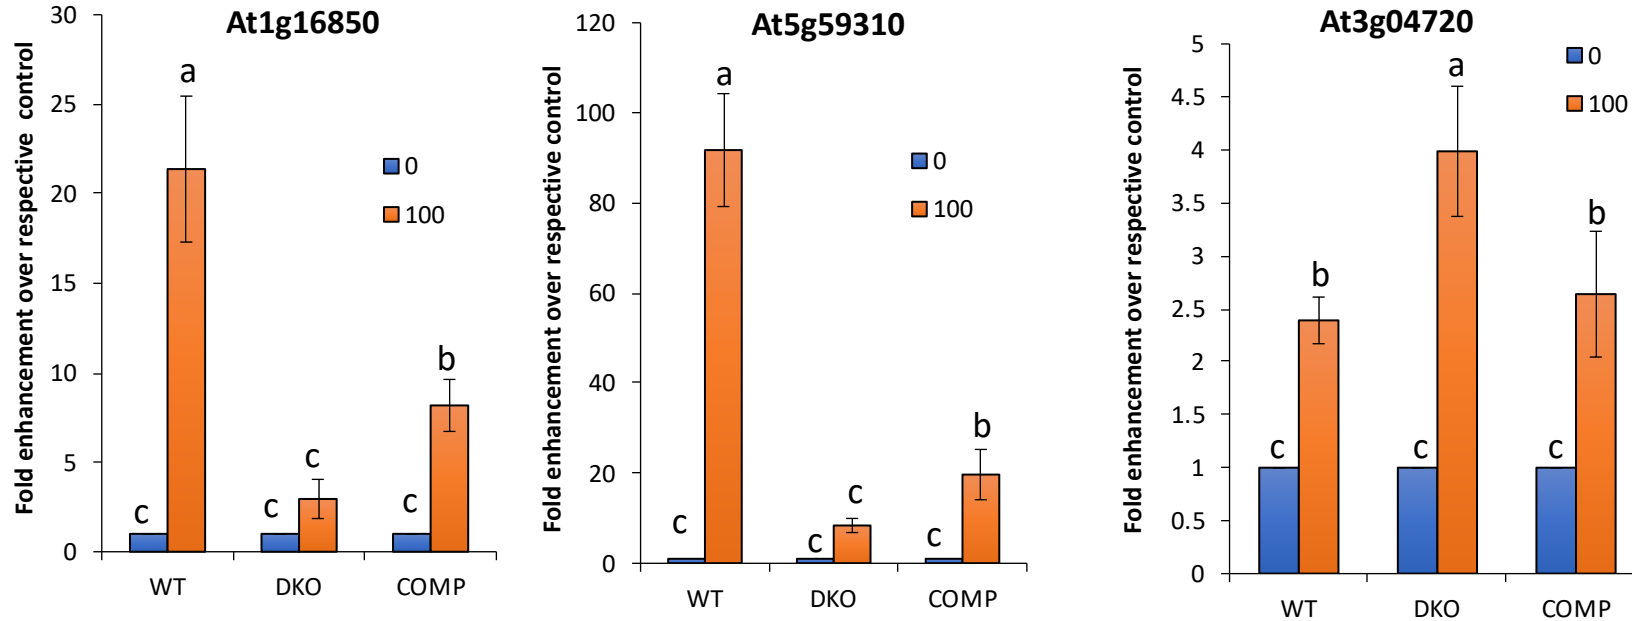

**Figure S4.** Restoration of the NaCl induction of salt-responsive genes in COMP2-4 line. Expression levels of salt-responsive genes in 10-day-old seedlings of COMP2-4 lines exposed to 0 and 100 mM NaCl are determined by RT-qPCR. The expression levels of salt-responsive genes were normalized with *ACTIN2*. Fold change in expression level relative to their respective controls (0 mM) is presented. 0 mM values were considered as 1. Three biological replicates were used. Student's t-test was performed and significant differences ( $P \leq 0.05$ ) among samples are labeled with different letters. The error bars represent SD.

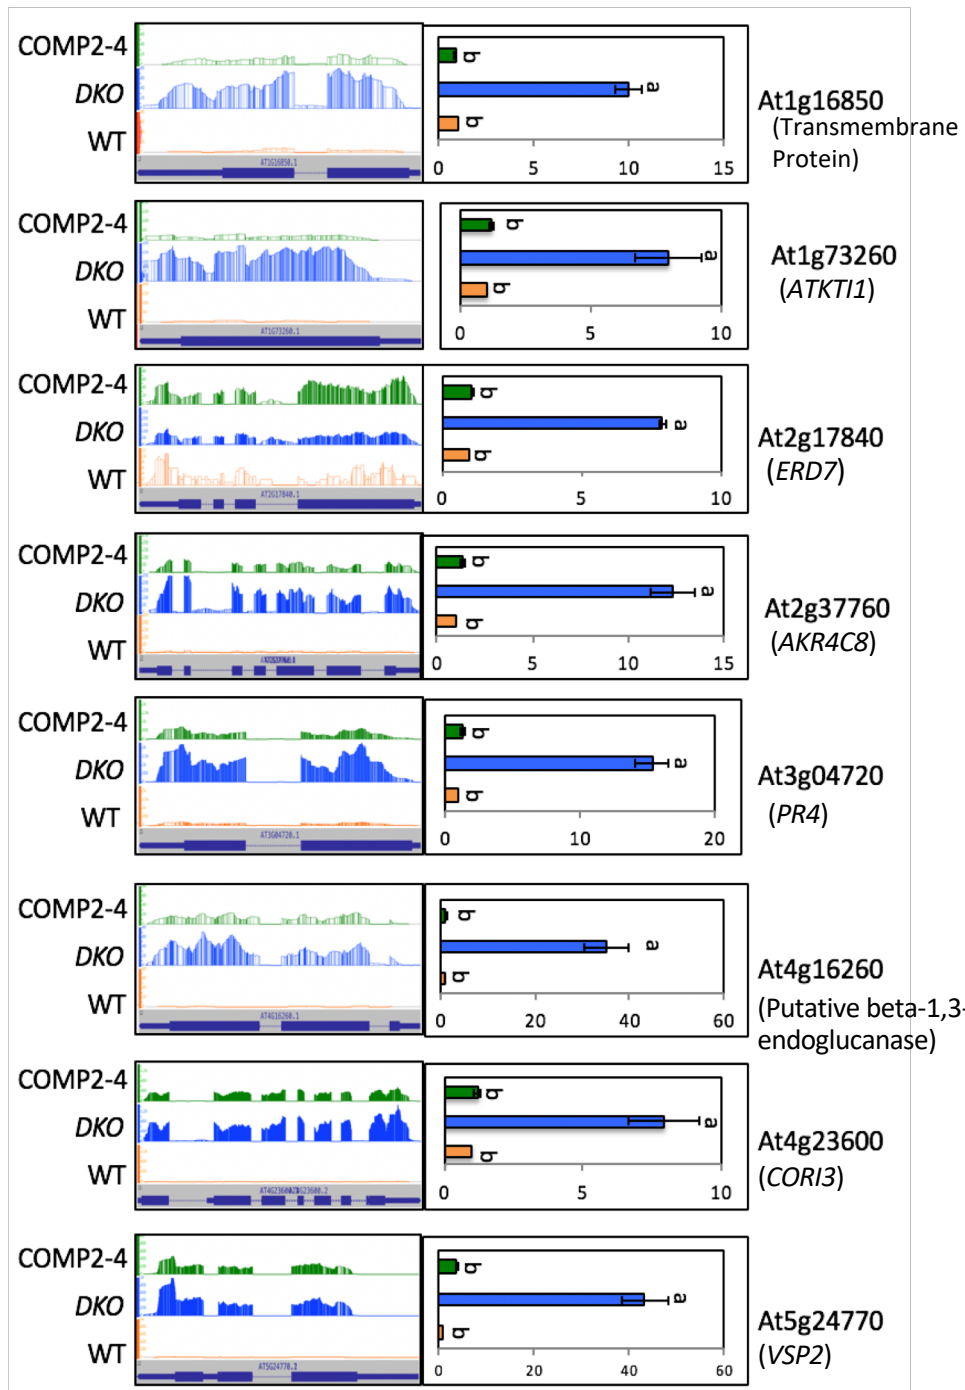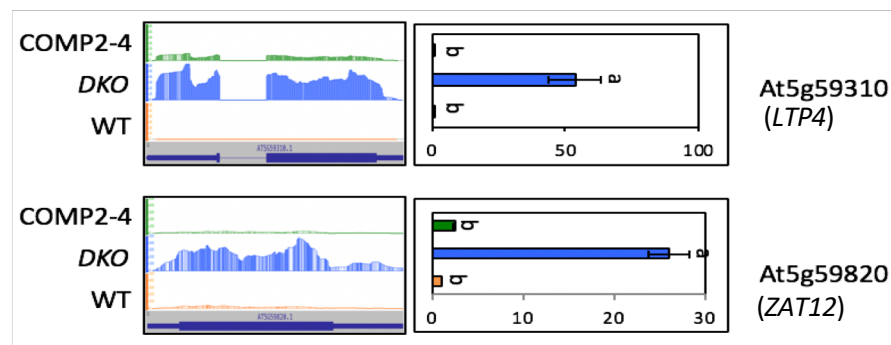

**Figure S5.** VOZs regulate salt-responsive genes. Expression levels of a few representative salt stress-responsive genes in WT, *DKO* and COMP 2-4. Left Panels: relative sequence read abundance (IGB view) as histograms in WT, *DKO* mutant (*voz1-1 voz1-2*) mutant and the complemented line (COMP2-4). The Y-axis indicates read depth with the same scale for all three lines. Right panels: Expression analysis of salt-responsive genes using RT-qPCR. Panels on right show fold change in expression level relative to WT. WT values were considered as 1. Student's t-test was performed and significant differences ( $P \leq 0.05$ ) among samples are labeled with different letters. The error bars represent SD.

(a)

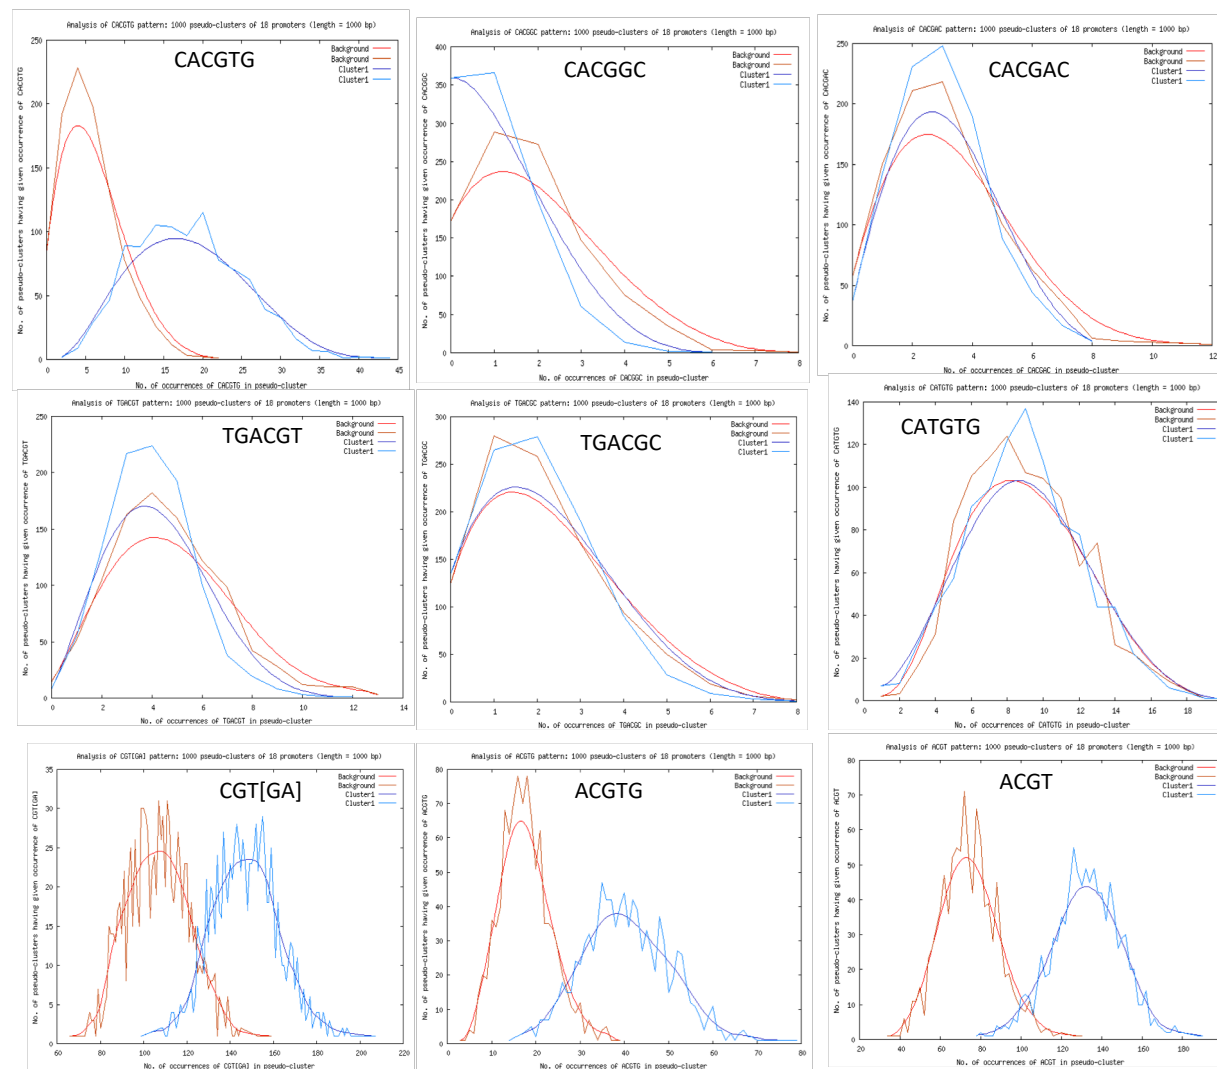

Salt, ABA and drought

ABA, drought and dehydration

VOZ binding site

**Figure S6.** Promoter analysis of differentially regulated salt-responsive genes. **(a)** POBO analysis indicating the occurrence of salt-specific *cis*-elements in the upstream (-1000 bp of TSS) of salt-responsive genes (Top panel). Occurrences of VOZs recognition motifs were also plotted (Bottom panel). Data pertaining to 18 salt-responsive genes were plotted. A significant (two-tailed  $P \leq 0.0001$ ) enrichment of only *CACGTG* (*G-Box*) motif was found in the promoter region of salt-responsive genes.



(b)

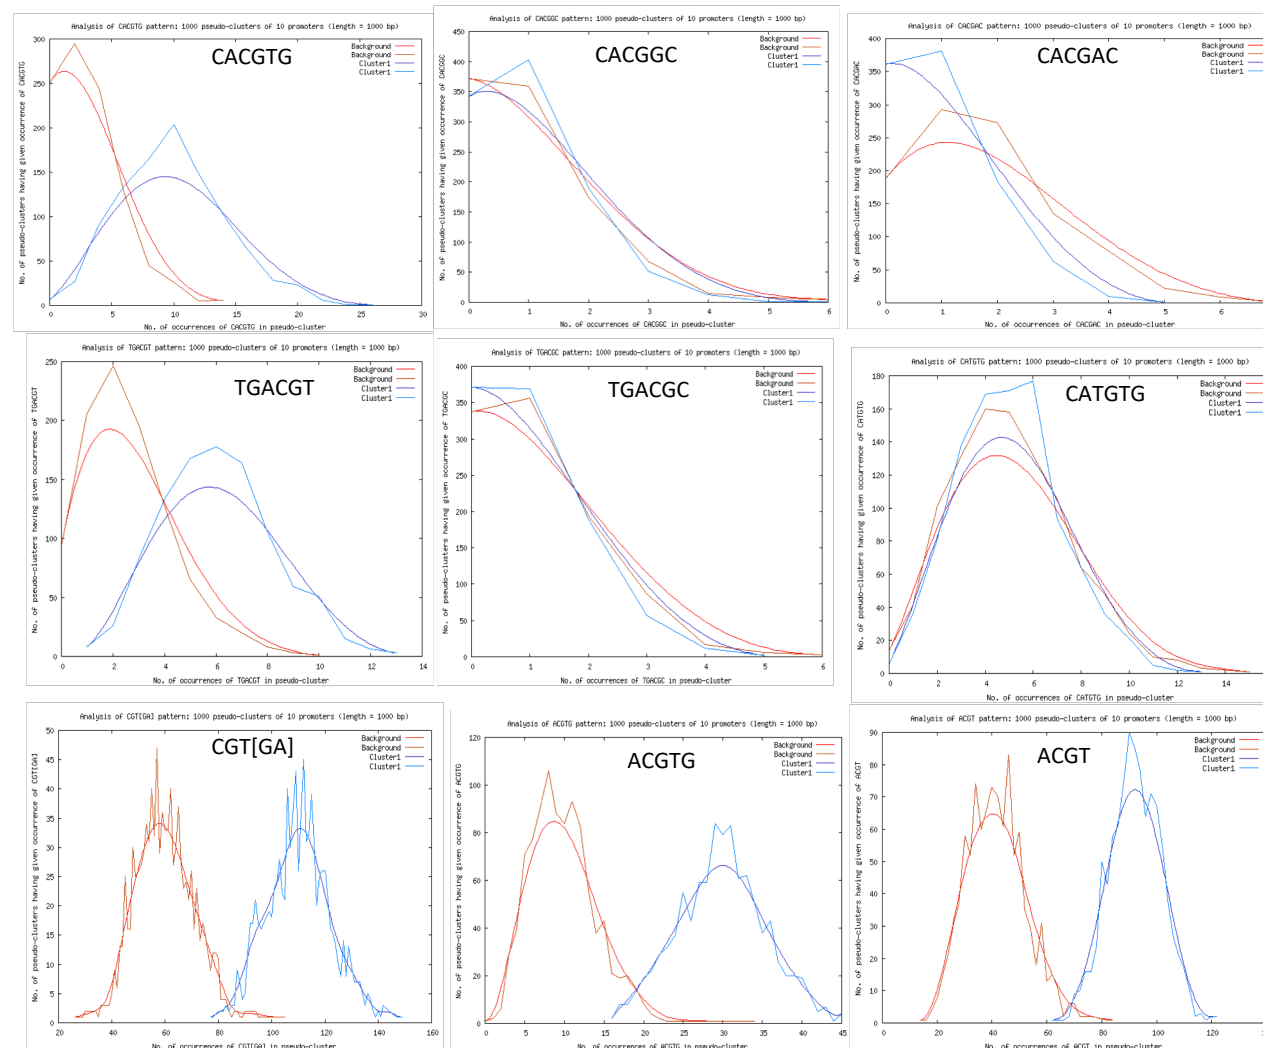

Salt, ABA and drought

ABA, drought and dehydration

VOZ binding site

**Figure S6.** Promoter analysis of differentially regulated salt-responsive genes. **(b)** POBO analysis indicating the occurrence of salt-specific *cis*-elements in the upstream (-1000 bp of TSS) of salt-responsive genes (Top panel). Occurrences of VOZs recognition motifs were also plotted (Bottom panel). Data pertaining to 10 salt-responsive genes were plotted. A significant (two-tailed  $P \leq 0.0001$ ) enrichment of only *CACGTG* (*G-Box*) motif was found in the promoter region of salt-responsive genes.

(a)

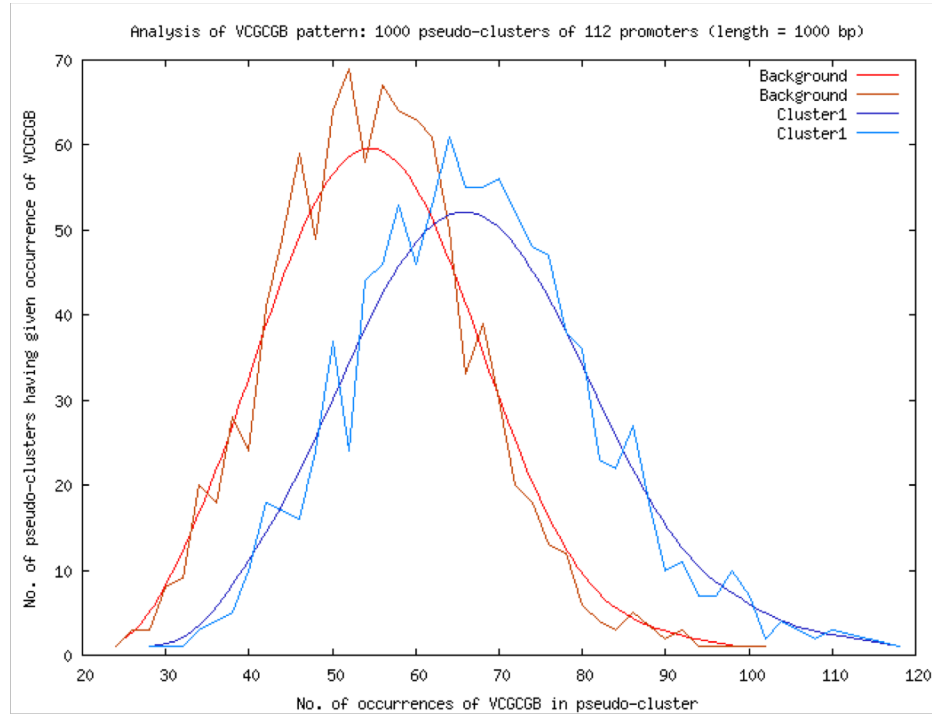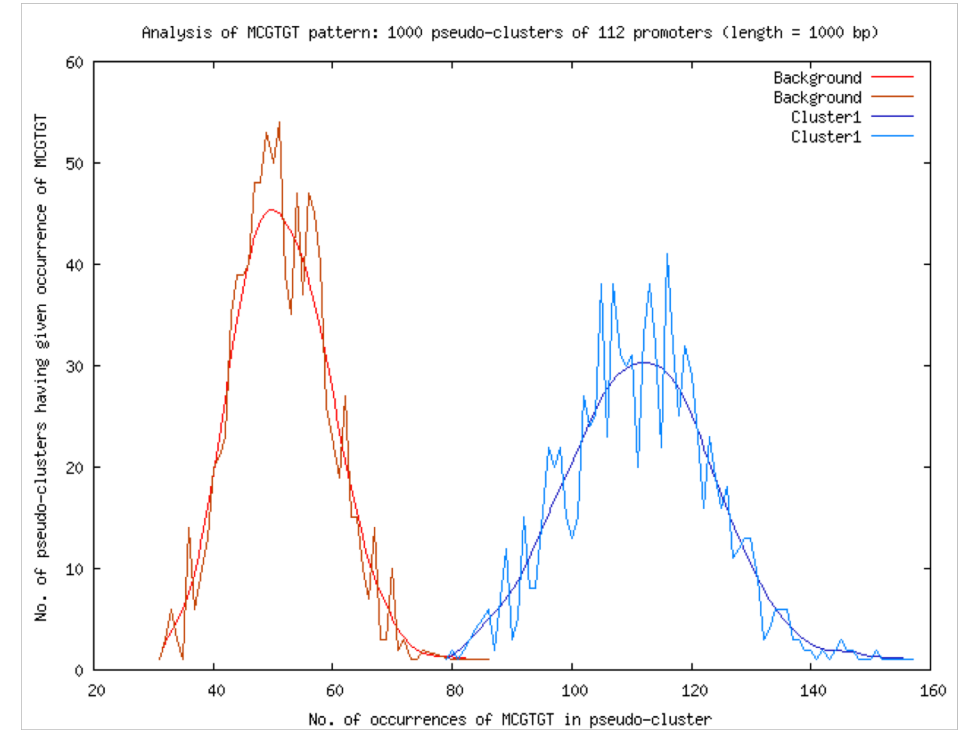

**Figure S7.** Analysis for RSRE element in the promoter region of DE and salt-responsive genes.

**(a)** POBO analysis for the occurrence of the *RSRE* (*VCGCGB*) and *MCGTGT* element in the upstream region of (-1000 bp from TSS) of all DE genes. Data pertaining to 112 DE genes were plotted. A significant (two-tailed  $P \leq 0.0001$ ) enrichment of *VCGCGB* and *MCGTGT* motifs was noted.



(b)

Salt regulated 18  
genes (VCGCGB)

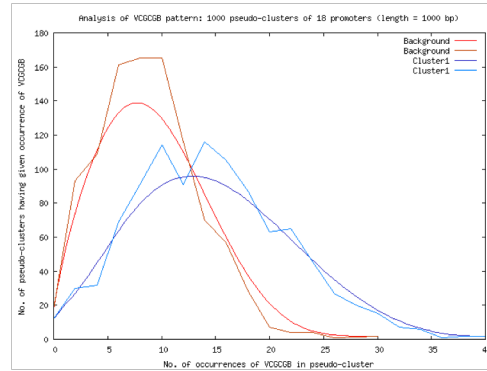

Salt regulated 18  
genes (MCGTGT)

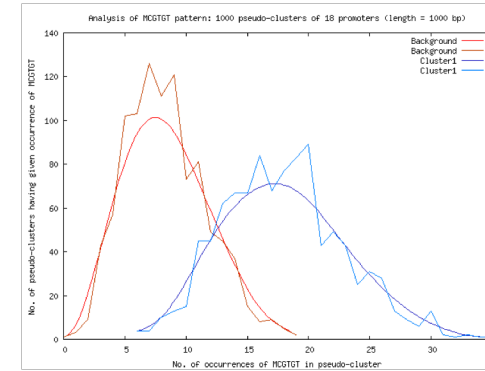

Salt regulated 10  
genes (VCGCGB)

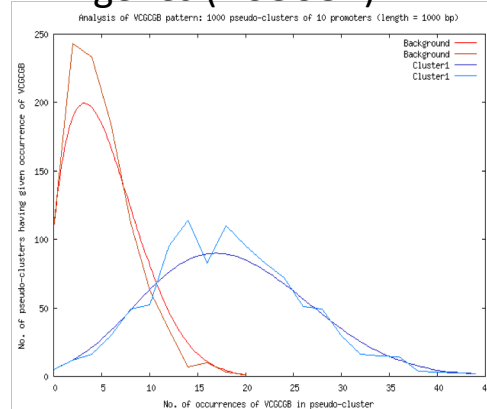

Salt regulated 10  
genes (MCGTGT)

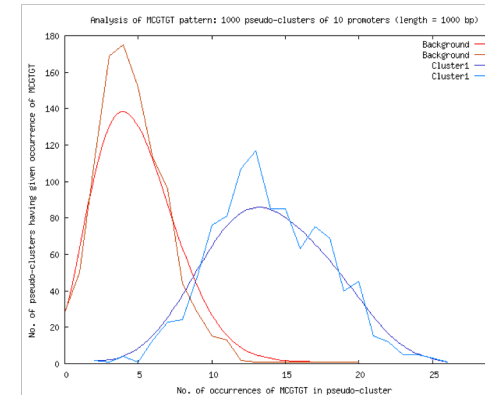

**Figure S7.** Analysis for RSRE element in the promoter region of DE and salt-responsive genes.

(b) POBO analysis indicating the occurrence of the *RSRE* (*VCGCGB*) and *MCGTGT* element in the upstream region of (-1000 bp from TSS) of salt-responsive genes. Data pertaining to 18 and 10 salt-responsive genes obtained in two different enrichment analyses were plotted, respectively. A significant (two-tailed  $P \leq 0.0001$ ) enrichment of *VCGCGB* and *MCGTGT* motifs was noted.

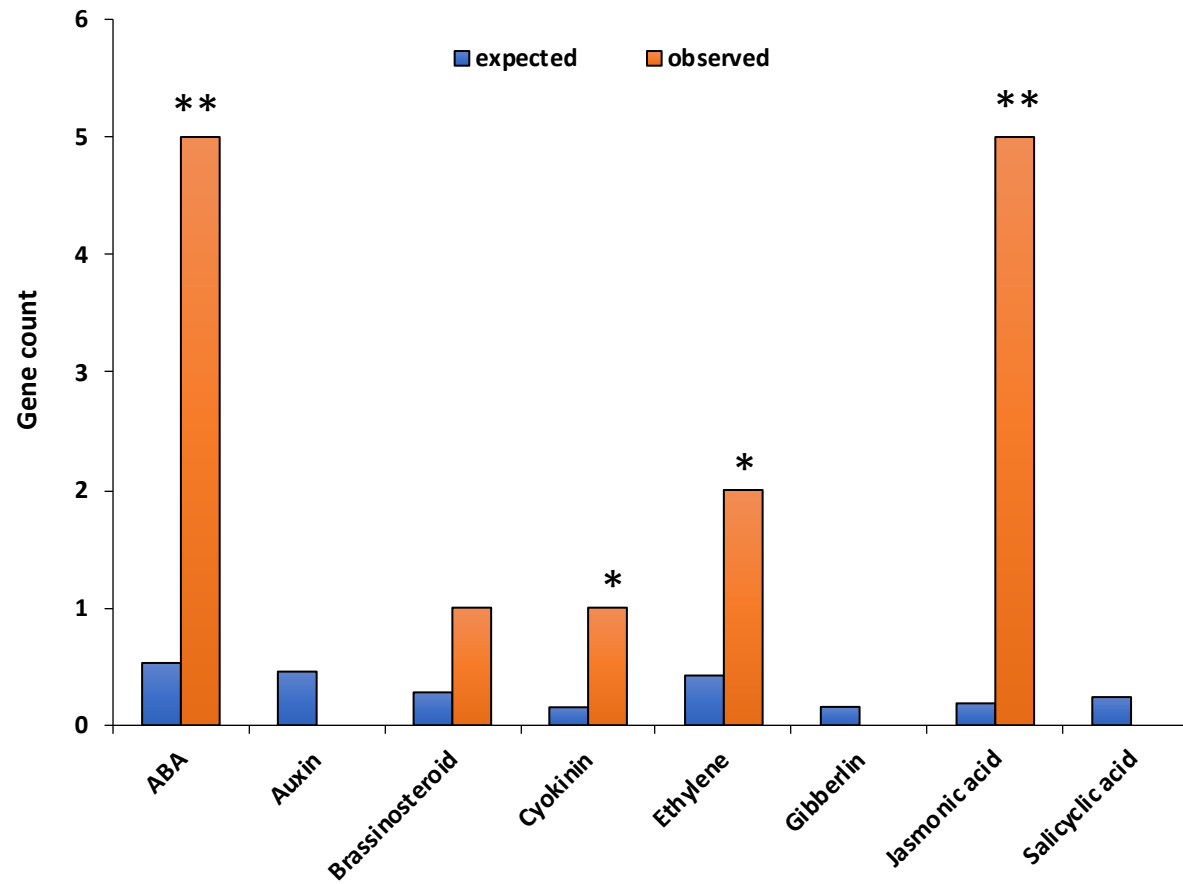

**Figure S8.** Enrichment of phytohormone-response pathways in DE genes. DE genes were enriched for various phytohormone-response pathways. Observed: Number of genes associated with each individual hormonal pathway. Expected: Number of genes expected to associate with each individual hormonal pathway in the whole genome. Asterisks above each bar represent significance level (\*\* for  $P \leq 0.0001$  and \*  $P \leq 0.05$ ).
